# Supplementary material for: Understanding moisture stability and degradation mechanisms of 2D hybrid perovskites: insights from ab initio molecular dynamics simulations
Source: Royal Society of Chemistry journal article supplement (doi:10.1039/d4ya00235k), 2024-01-01
Supplement: d4ya00235k1.pdf [file d4ya00235k1.pdf]

## Supporting Information

### **Understanding Moisture Stability and Degradation Mechanisms in 2D Hybrid Perovskites: Insights from Ab Initio Molecular Dynamics Simulations**

Eti Mahal,<sup>†</sup> Surya Sekhar Manna,<sup>†</sup> Sandeep Das,<sup>†</sup> and Biswarup Pathak<sup>†\*</sup>

<sup>†</sup>Department of Chemistry, Indian Institute of Technology Indore, Indore 453552, India

\*Email: [biswarup@iiti.ac.in](mailto:biswarup@iiti.ac.in)

### **Contents**

**Table S1.** Lattice parameters of all considered models.

**Figure S1.** Post simulation geometries of PbI<sub>2</sub> terminated (a) RP/H<sub>2</sub>O interface and (b) DJ/H<sub>2</sub>O interface.

**Figure S2.** Integrated distribution plots of Pb–O radial pair distribution of PbI<sub>2</sub> terminated RP/H<sub>2</sub>O interface and DJ/H<sub>2</sub>O interface.

**Figure S3.** Histograms of the number of adsorbed waters per metal for the PbI<sub>2</sub> terminated water interfaces throughout the MD trajectories.

**Figure S4.** Post simulation geometries of I terminated (a) RP/H<sub>2</sub>O interface and (b) DJ/H<sub>2</sub>O interface.

**Figure S5.** Post simulation geometries of cation terminated (a) RP/H<sub>2</sub>O interface and (b) DJ/H<sub>2</sub>O interface.

**Table S1:** Lattice parameters of all considered models.

| <b>Phase</b>             | <b>Cell Parameters</b> | <b>PbI<sub>2</sub> termination (Å)</b> | <b>I termination (Å)</b> | <b>Cation termination (Å)</b> |
|--------------------------|------------------------|----------------------------------------|--------------------------|-------------------------------|
| <b>RP/H<sub>2</sub>O</b> | <i>a</i>               | 17.65                                  | 17.65                    | 17.65                         |
|                          | <i>b</i>               | 17.14                                  | 17.14                    | 17.14                         |
|                          | <i>c</i>               | 62.50                                  | 63.82                    | 59.94                         |
| <b>DJ/H<sub>2</sub>O</b> | <i>a</i>               | 18.32                                  | 18.32                    | 18.32                         |
|                          | <i>b</i>               | 17.01                                  | 17.01                    | 17.01                         |
|                          | <i>c</i>               | 51.00                                  | 53.74                    | 48.62                         |

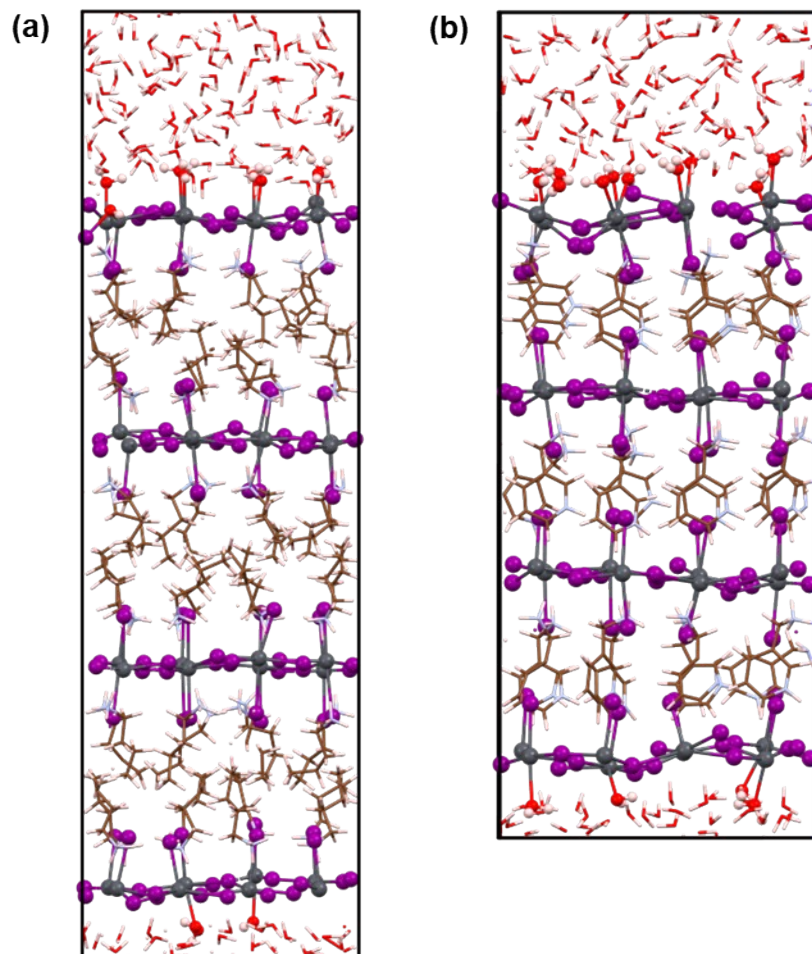

**Figure S1.** Post simulation geometries of  $\text{PbI}_2$  terminated (a) RP/ $\text{H}_2\text{O}$  interface and (b) DJ/ $\text{H}_2\text{O}$  interface.

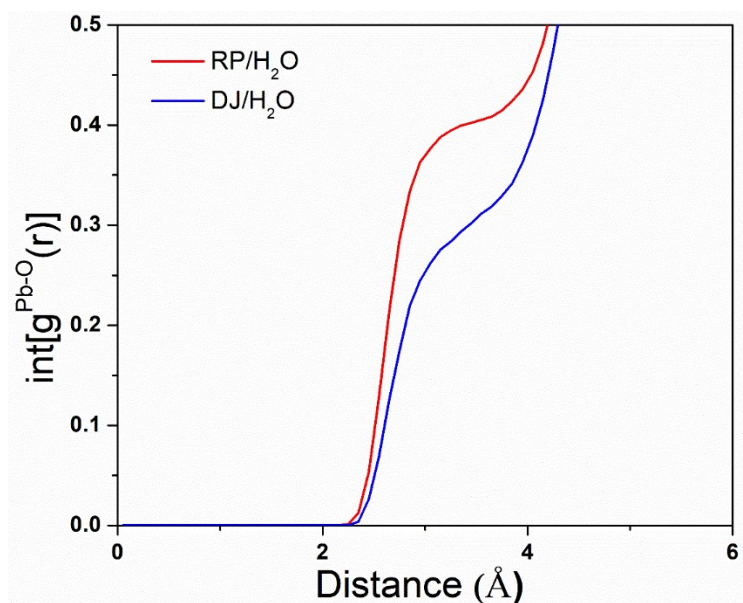

**Figure S2.** Integrated distribution plots of Pb–O radial pair distribution of  $\text{PbI}_2$  terminated RP/ $\text{H}_2\text{O}$  interface and DJ/ $\text{H}_2\text{O}$  interface.

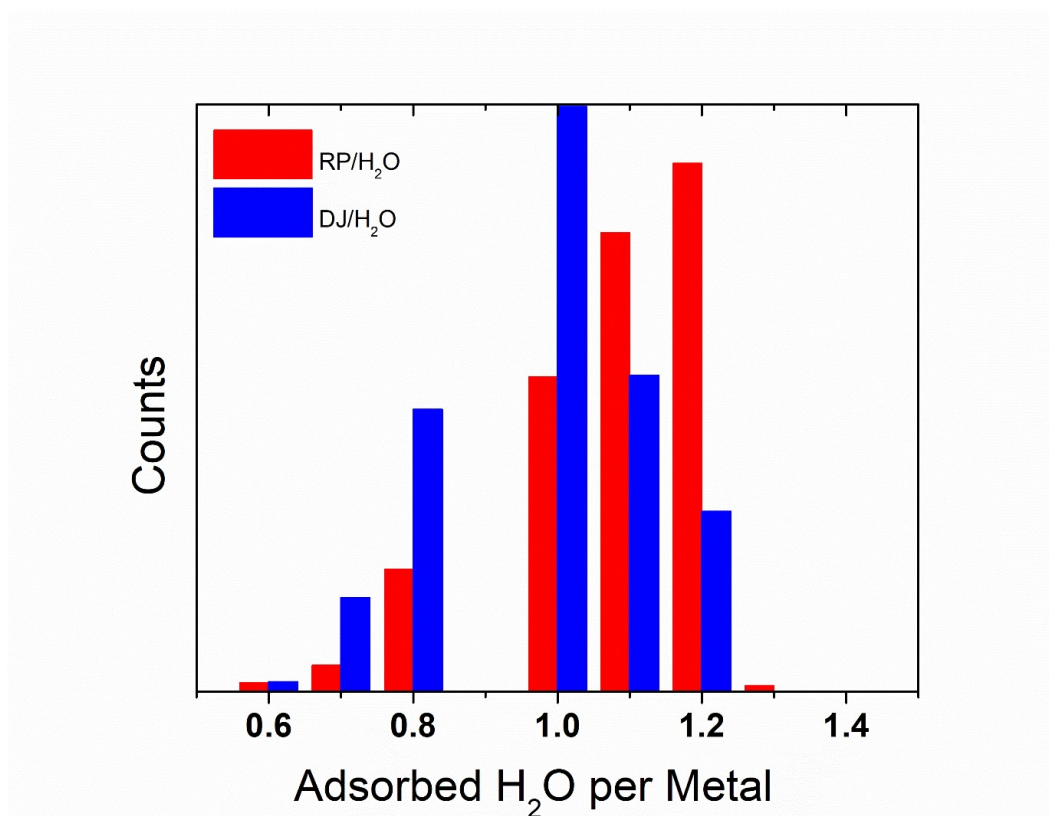

**Figure S3.** Histograms of the number of adsorbed waters per metal for the  $\text{PbI}_2$  terminated water interfaces throughout the MD trajectories.

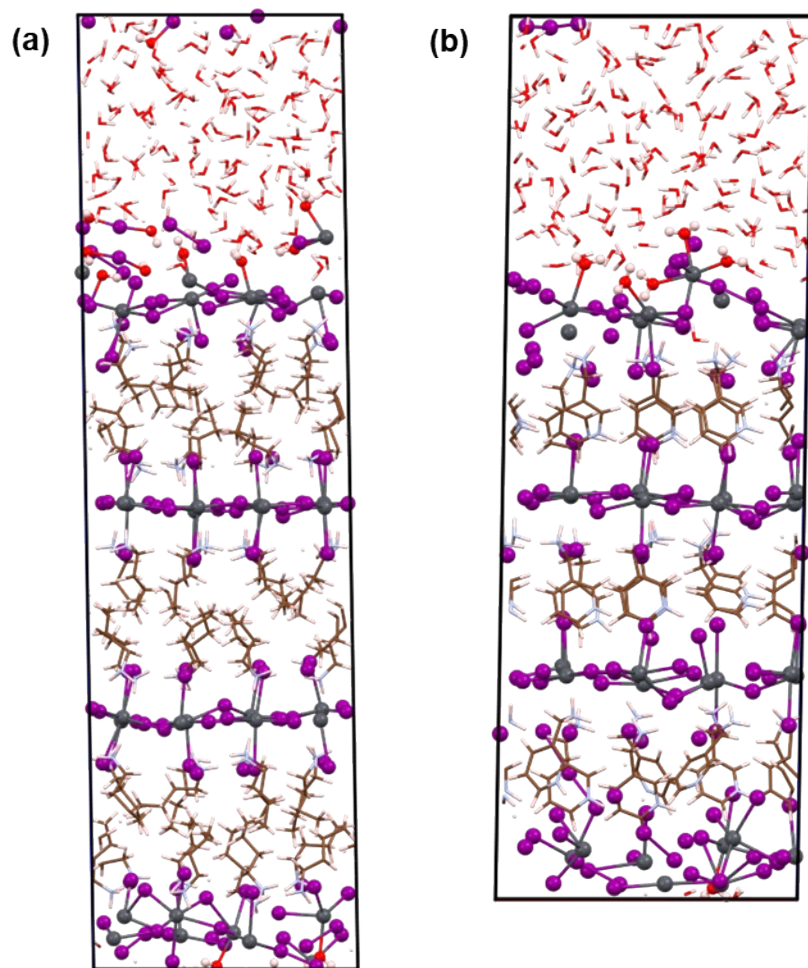

**Figure S4.** Post simulation geometries of I terminated (a) RP/H<sub>2</sub>O interface and (b) DJ/H<sub>2</sub>O interface.

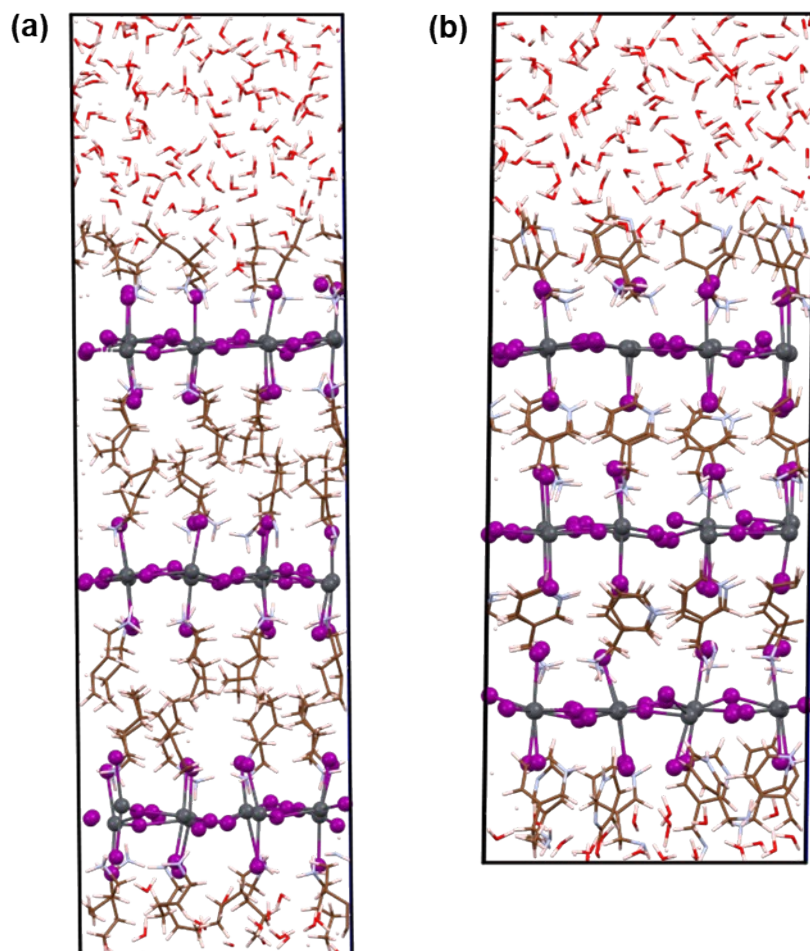

**Figure S5.** Post simulation geometries of cation terminated (a) RP/H<sub>2</sub>O interface and (b) DJ/H<sub>2</sub>O interface.
